# Supplementary material for: Effects of Intranasal Insulin on Postoperative Delirium in Older Patients with and without Type 2 Diabetes Mellitus: A Secondary Analysis of a Randomized Clinical Trial
Source: Research Square preprint supplement (doi:10.21203/rs.3.rs-7097922/v1), 2025-08-14
Supplement: Supplementary file 1 [file 053aa47d679de4228fcdb9de.docx]

**Supplementarytable1.Univariate logistic regression analysis of variables for POD**

| **Characteristic** | **OR** | **95% CI lower** | **95% CI upper** | ***P* value** |
| --- | --- | --- | --- | --- |
| Intranasal insulin treatment | 0.368 | 0.132 | 0.939 | 0.043 |
| T2DM | 1.551 | 0.618 | 3.872 | 0.344 |
| Age | 0.982 | 0.843 | 1.117 | 0.797 |
| Female | 0.619 | 0.248 | 1.554 | 0.301 |
| BMI | 0.887 | 0.770 | 1.010 | 0.080 |
| Education level (>6years) | 2.078 | | 0.815 | | --- | | | 5.789 | | --- | | | 0.138 | | --- | |
| Smoking | 0.738 | 0.110 | 2.979 | 0.705 |
| Alcohol use | 0.674 | 0.101 | 2.689 | 0.621 |
| Hypertension | 1.053 | 0.425 | 2.672 | 0.911 |
| Cardiac disease | 0.388 | 0.021 | 2.160 | 0.377 |
| Surgery time | 1.005 | 0.998 | 1.011 | 0.171 |
| Preoperative MMSE scores | 0.802 | 0.618 | 1.039 | 0.092 |
| Preoperative MoCA-B scores | 0.971 | 0.810 | 1.175 | 0.758 |
| Preoperative fasting glucose | 1.193 | 0.773 | 1.822 | 0.415 |
| Intraoperative fasting glucose | 0.936 | 0.712 | 1.184 | 0.604 |
| Preoperative fasting insulin | 0.943 | 0.815 | 1.085 | 0.417 |
| Intraoperative fasting insulin | 0.973 | 0.860 | 1.094 | 0.649 |
| Preoperative HOMA-IR | 0.984 | 0.578 | 1.623 | 0.951 |
| Intraoperative HOMA-IR | 0.865 | 0.626 | 1.141 | 0.338 |

T2DM, type 2 diabetes mellitus. BMI, body mass index. MMSE, Mini-Mental Status Examination. MoCA-B, Montreal cognitive assessment-Basic. HOMA-IR, Homeostasis model assessment−insulin resistance.
